# Supplementary material
Source: Springer Nature journal article supplement (https://www.springermedizin.de/resource/supplementary/12960_2013_361_MOESM1_ESM.pdf/9569944)

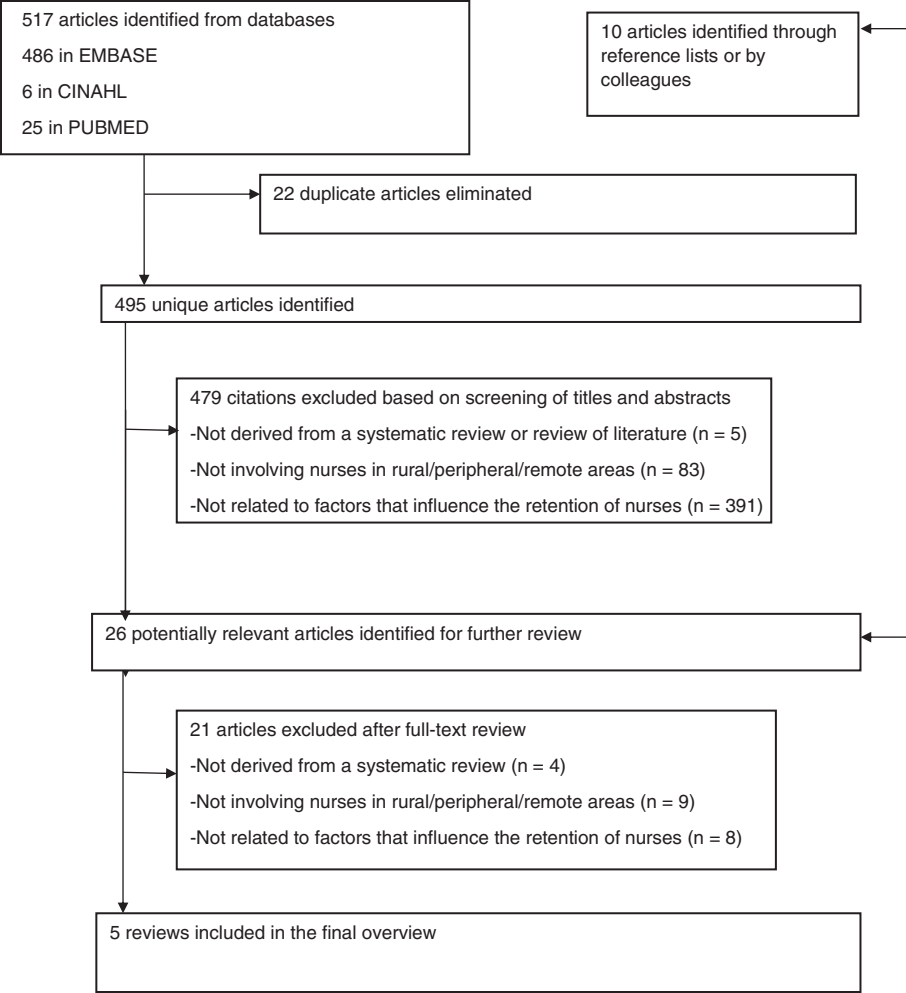

Supplement: MOESM1 [file 9569944]
